# Supplementary material
Source: publisher figshare collection journal article supplement (https://frontiersin.figshare.com/ndownloader/files/12942776)
Supplement: Supplementary file [file 12942776]

## *Supplementary Material*

### **Enhanced bacterial growth and gene expression of D-amino acid dehydrogenase with D-glutamate as a sole carbon source**

**Takeshi Naganuma\*, Yoshiakira Iinuma, Hitomi Nishiwaki, Ryota Murase, Kazuo Masaki, Ryosuke Nakai**

\* **Correspondence:** Takeshi Naganuma: takn@hiroshima-u.ac.jp

**Supplementary Table S1.** Tabularized program of gradient HPLC for the analysis of D/L ratios of amino acids.

| Time<br>(min) | Methanol<br>concentration (%) | 50 mM sodium acetate<br>concentration (%) | Flow rate<br>(ml min <sup>-1</sup> ) |
|---------------|-------------------------------|-------------------------------------------|--------------------------------------|
| 0             | 3                             | 97                                        | 1.2                                  |
| 16            | 24                            | 76                                        | 1.2                                  |
| 24            | 24                            | 76                                        | 1.2                                  |
| 29            | 40                            | 60                                        | 1.2                                  |
| 35            | 40                            | 60                                        | 1.2                                  |
| 35.1          | 3                             | 97                                        | 1.2                                  |
| 40            | 3                             | 97                                        | 0.5                                  |
